# Supplementary material
Source: PubMed Central journal article supplement (PMC4280294)
Supplement: NIHMS629766-supplement-Supp_Material.pdf [file NIHMS629766-supplement-Supp_Material.pdf]

**Birth to 36 months: Girls**  
**Length-for-age and Weight-for-age percentiles**

NAME **Patient 8**

RECORD # \_\_\_\_\_

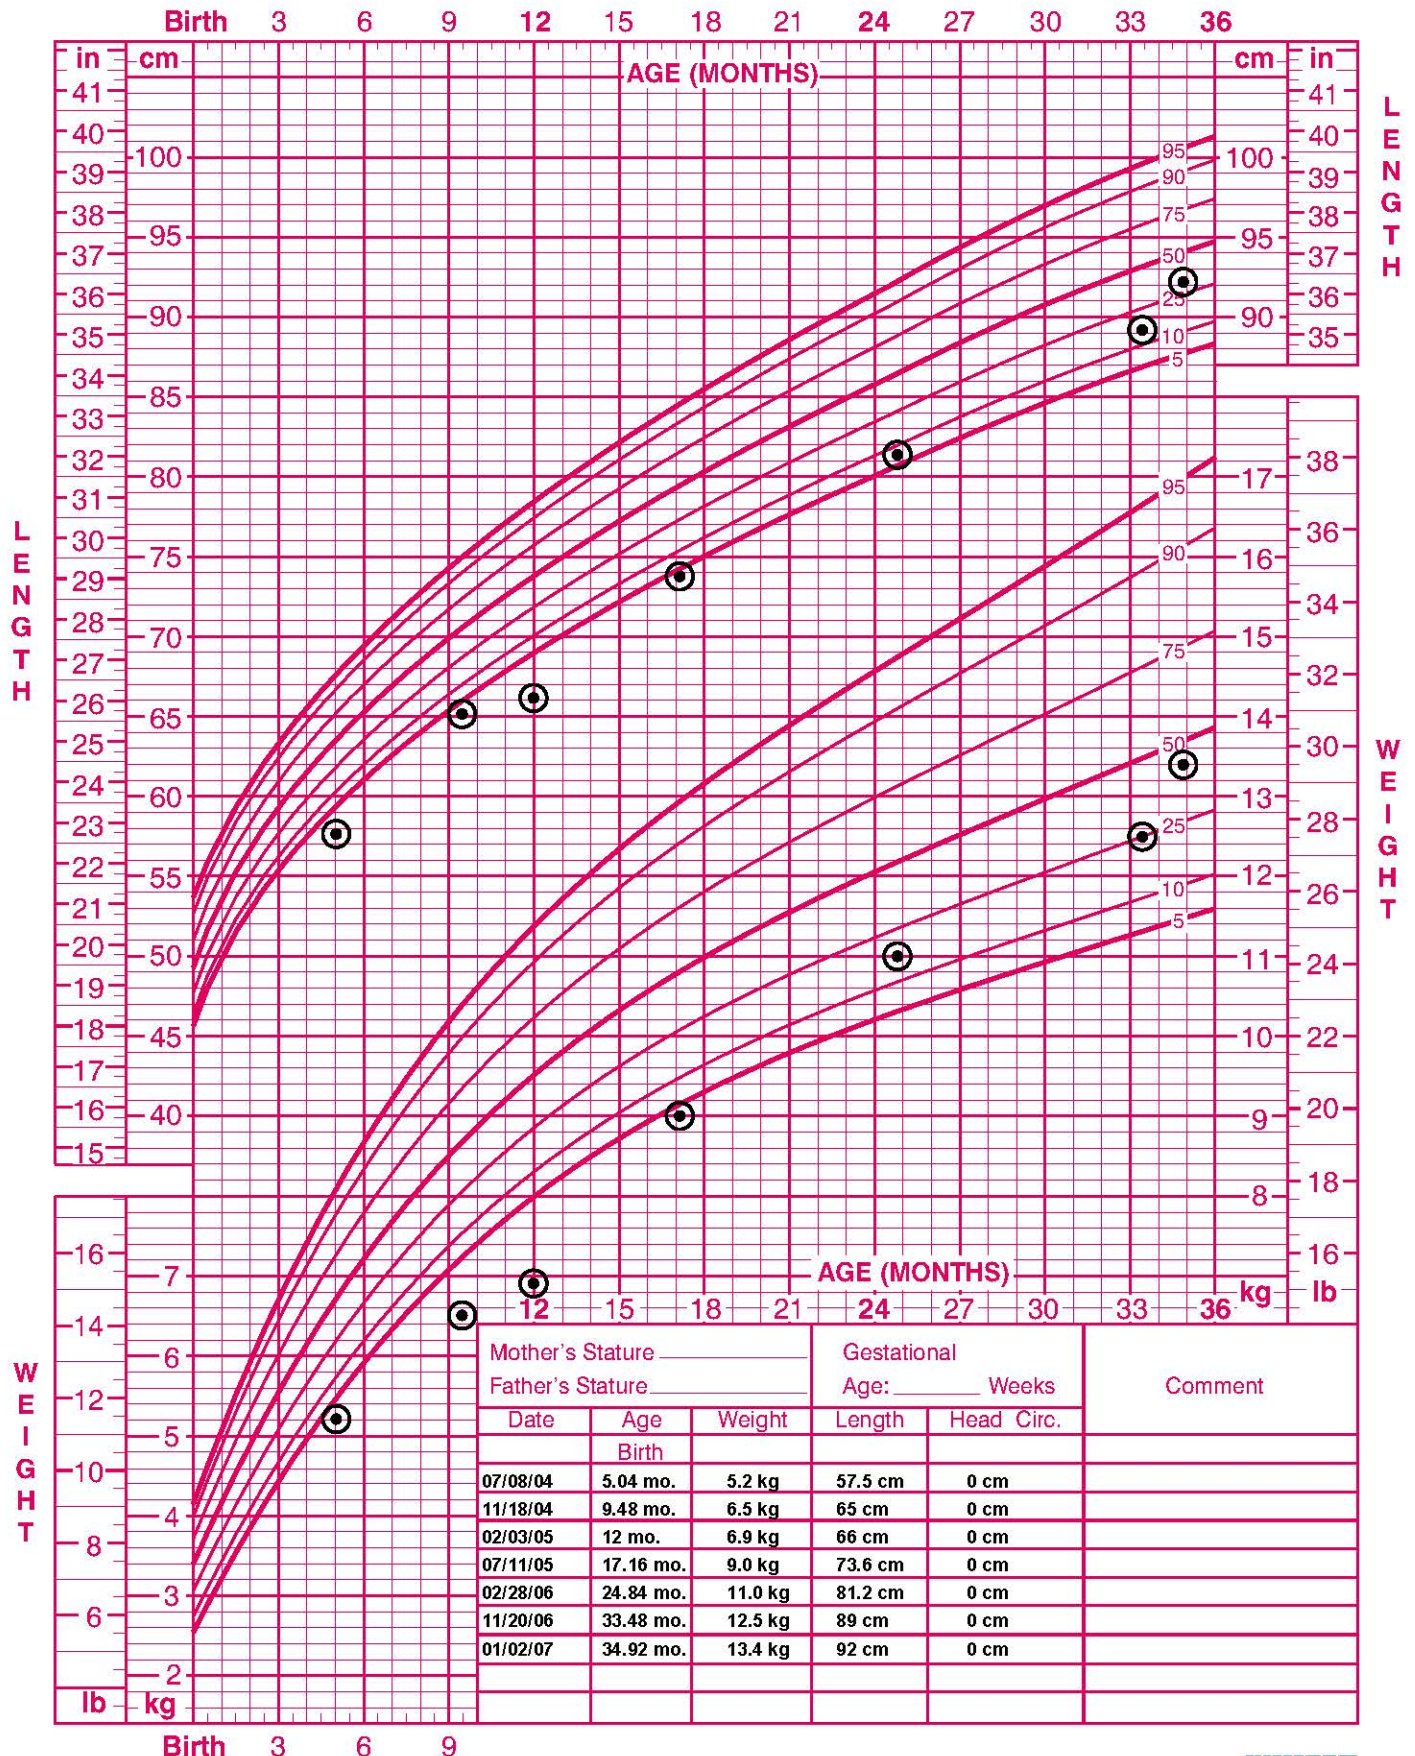

Published May 30, 2000 (modified 4/20/01).

SOURCE: Developed by the National Center for Health Statistics in collaboration with the National Center for Chronic Disease Prevention and Health Promotion (2000).  
<http://www.cdc.gov/growthcharts>

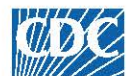

**SAFER • HEALTHIER • PEOPLE™**

# 2 to 20 years: Girls

## Stature-for-age and Weight-for-age percentiles

NAME **Patient 8**

RECORD # \_\_\_\_\_

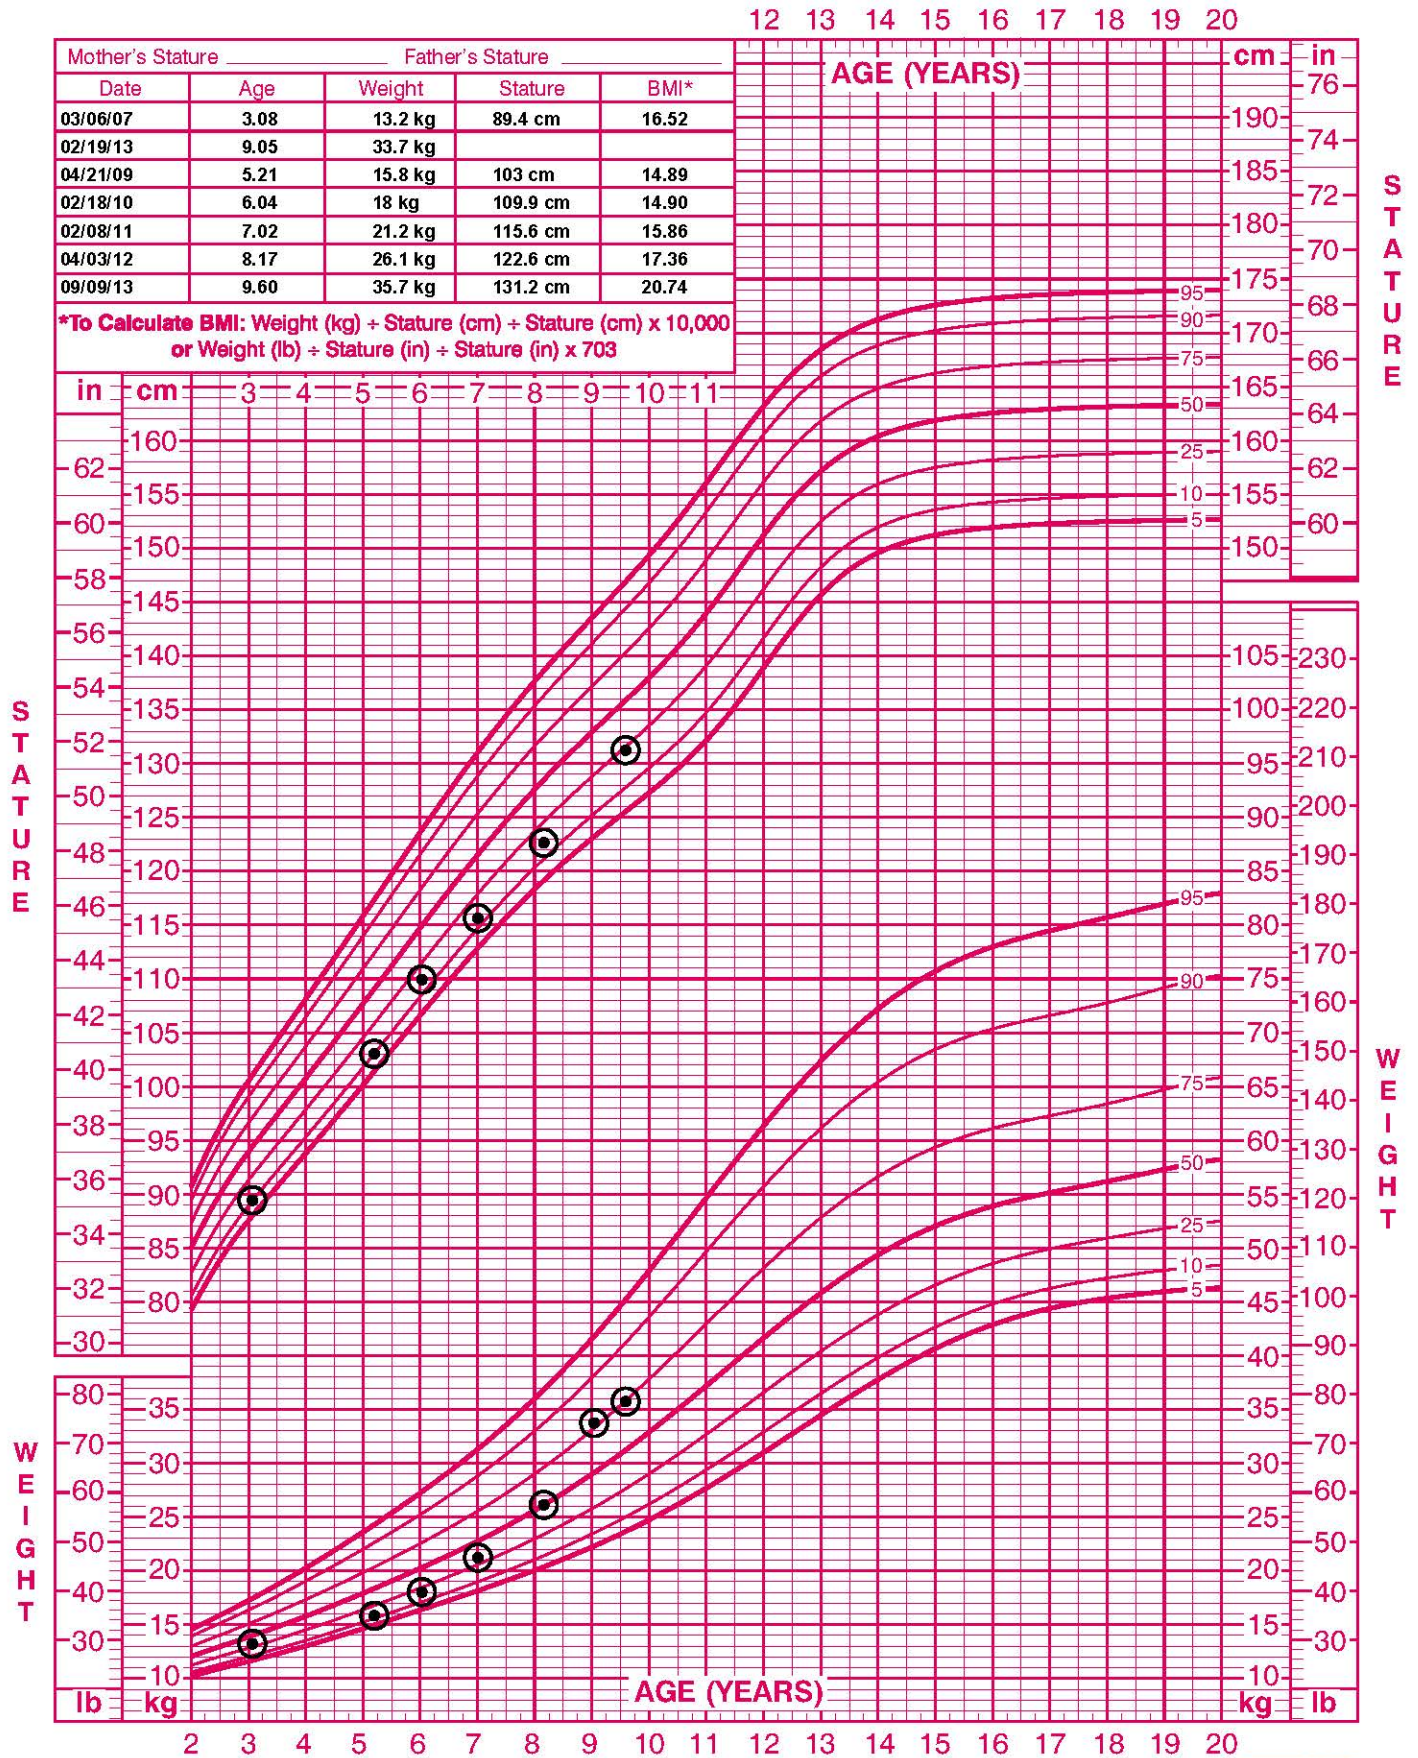

Published May 30, 2000 (modified 11/21/00).

SOURCE: Developed by the National Center for Health Statistics in collaboration with the National Center for Chronic Disease Prevention and Health Promotion (2000).  
<http://www.cdc.gov/growthcharts>

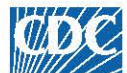

SAFER • HEALTHIER • PEOPLE™

**Birth to 36 months: Girls**  
**Length-for-age and Weight-for-age percentiles**

NAME **Patient 4**

RECORD # \_\_\_\_\_

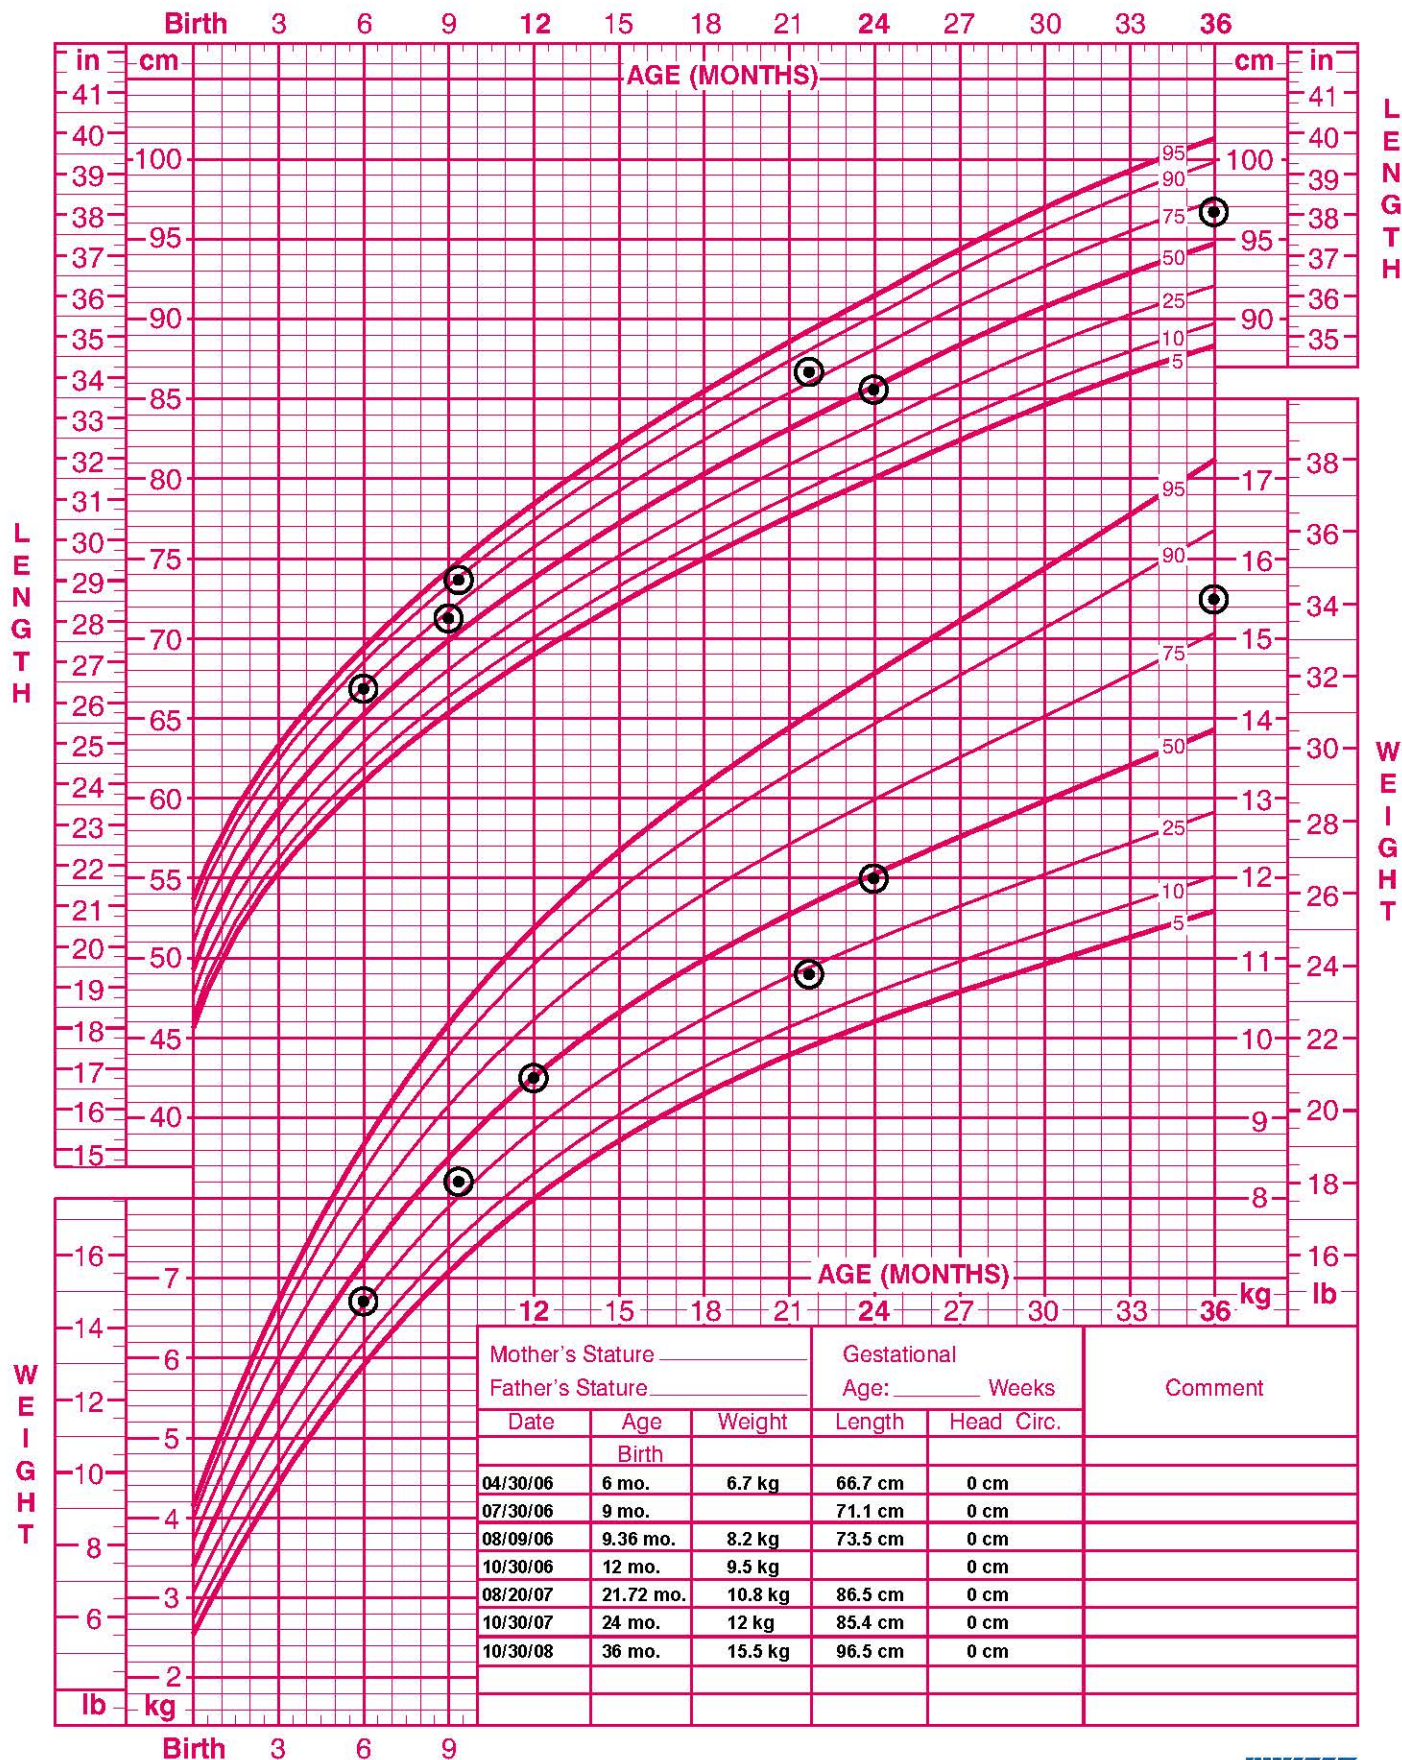

| Mother's Stature _____ |           | Gestational Age: _____ Weeks |         | Comment |
|------------------------|-----------|------------------------------|---------|---------|
| Father's Stature _____ |           |                              |         |         |
| Date                   | Age       | Weight                       | Length  |         |
|                        | Birth     |                              |         |         |
| 04/30/06               | 6 mo.     | 6.7 kg                       | 66.7 cm | 0 cm    |
| 07/30/06               | 9 mo.     |                              | 71.1 cm | 0 cm    |
| 08/09/06               | 9.36 mo.  | 8.2 kg                       | 73.5 cm | 0 cm    |
| 10/30/06               | 12 mo.    | 9.5 kg                       |         | 0 cm    |
| 08/20/07               | 21.72 mo. | 10.8 kg                      | 86.5 cm | 0 cm    |
| 10/30/07               | 24 mo.    | 12 kg                        | 85.4 cm | 0 cm    |
| 10/30/08               | 36 mo.    | 15.5 kg                      | 96.5 cm | 0 cm    |

Published May 30, 2000 (modified 4/20/01).

SOURCE: Developed by the National Center for Health Statistics in collaboration with the National Center for Chronic Disease Prevention and Health Promotion (2000).  
<http://www.cdc.gov/growthcharts>

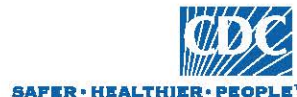

# 2 to 20 years: Girls

## Stature-for-age and Weight-for-age percentiles

NAME **Patient 4**

RECORD # \_\_\_\_\_

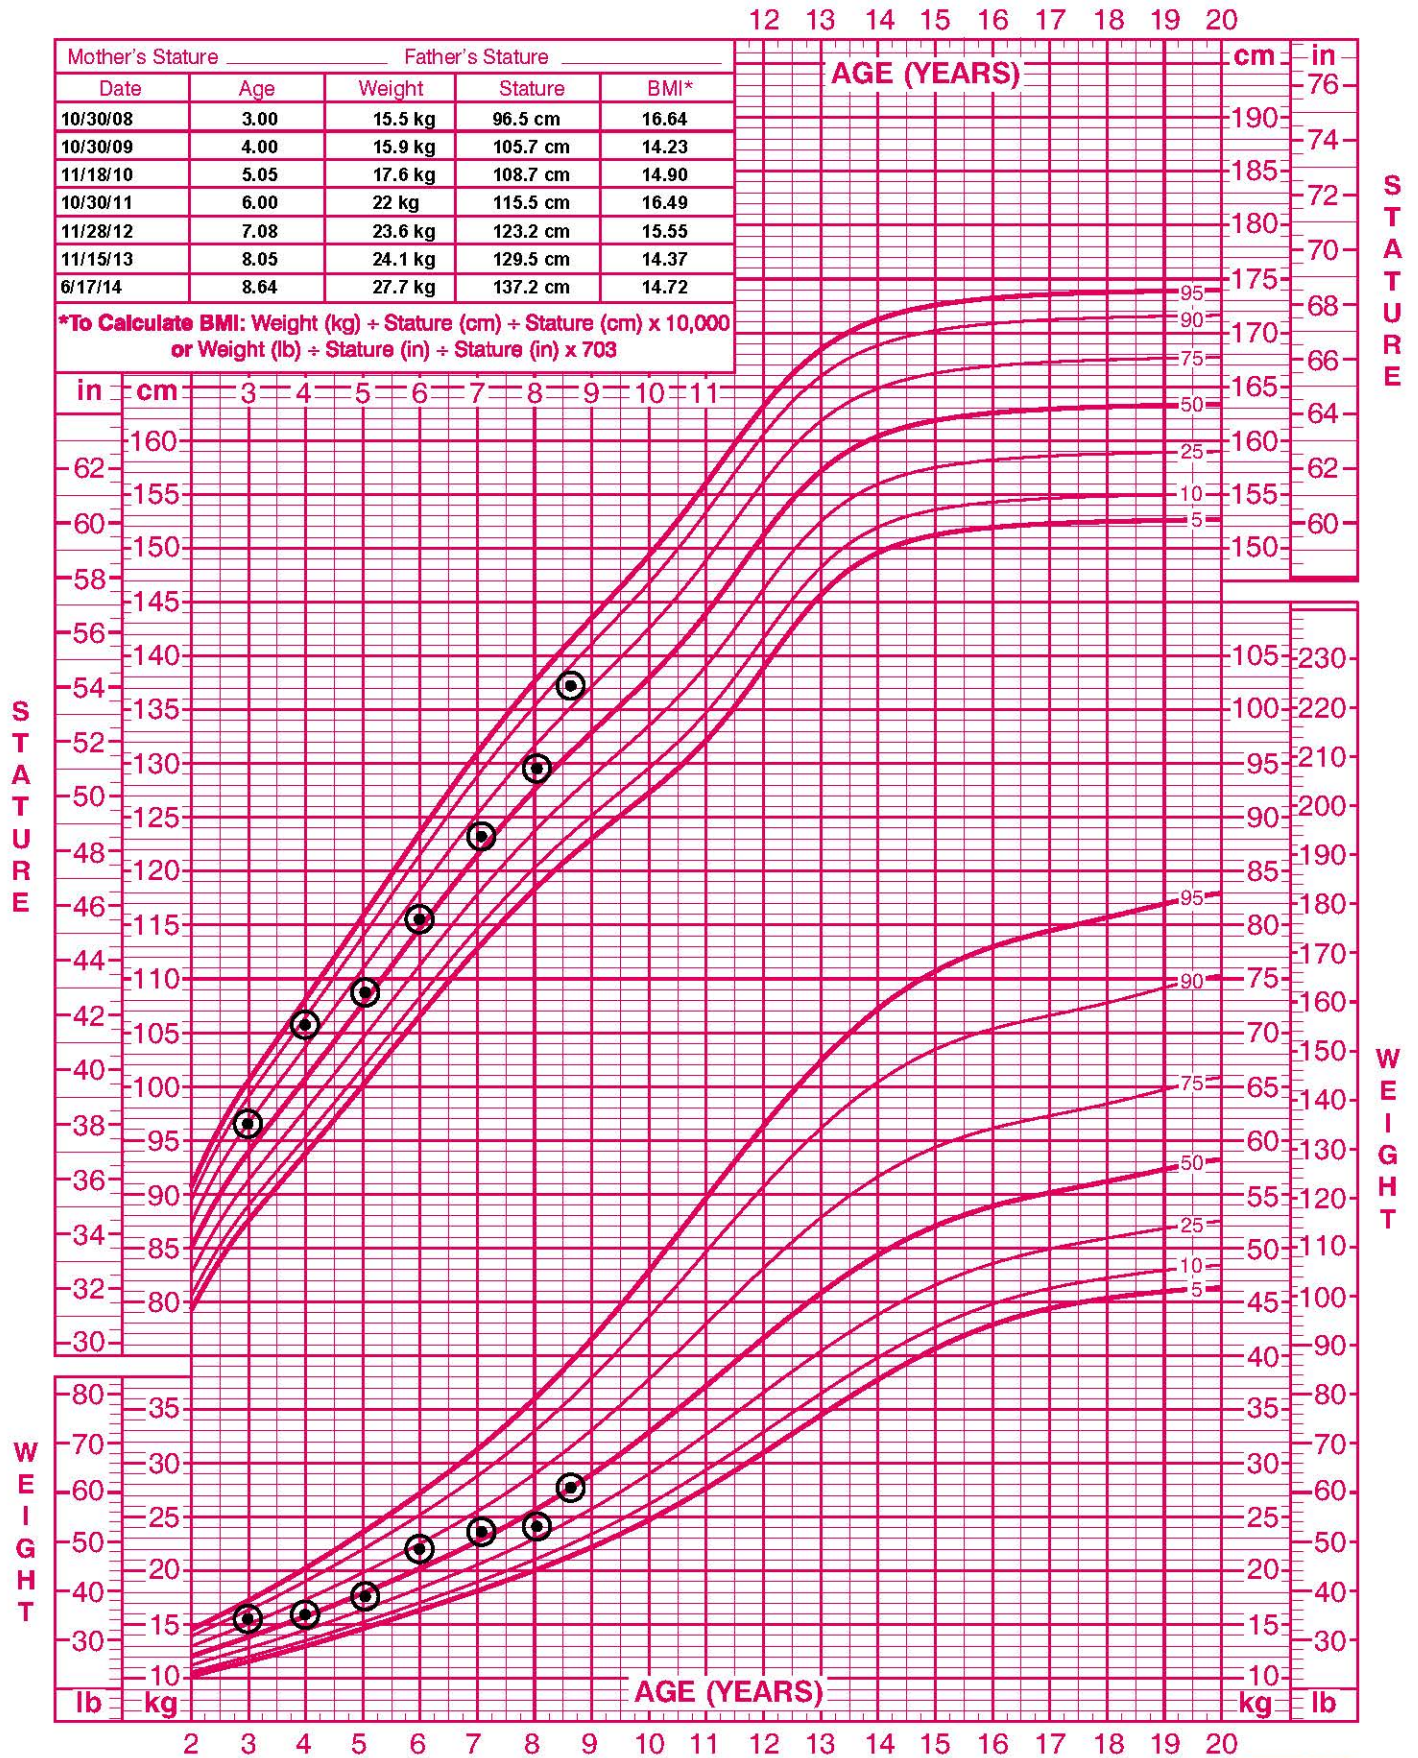

Published May 30, 2000 (modified 11/21/00).

SOURCE: Developed by the National Center for Health Statistics in collaboration with the National Center for Chronic Disease Prevention and Health Promotion (2000).  
<http://www.cdc.gov/growthcharts>

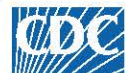

SAFER • HEALTHIER • PEOPLE™

# Birth to 36 months: Boys

## Length-for-age and Weight-for-age percentiles

NAME **Patient 9**

RECORD # \_\_\_\_\_

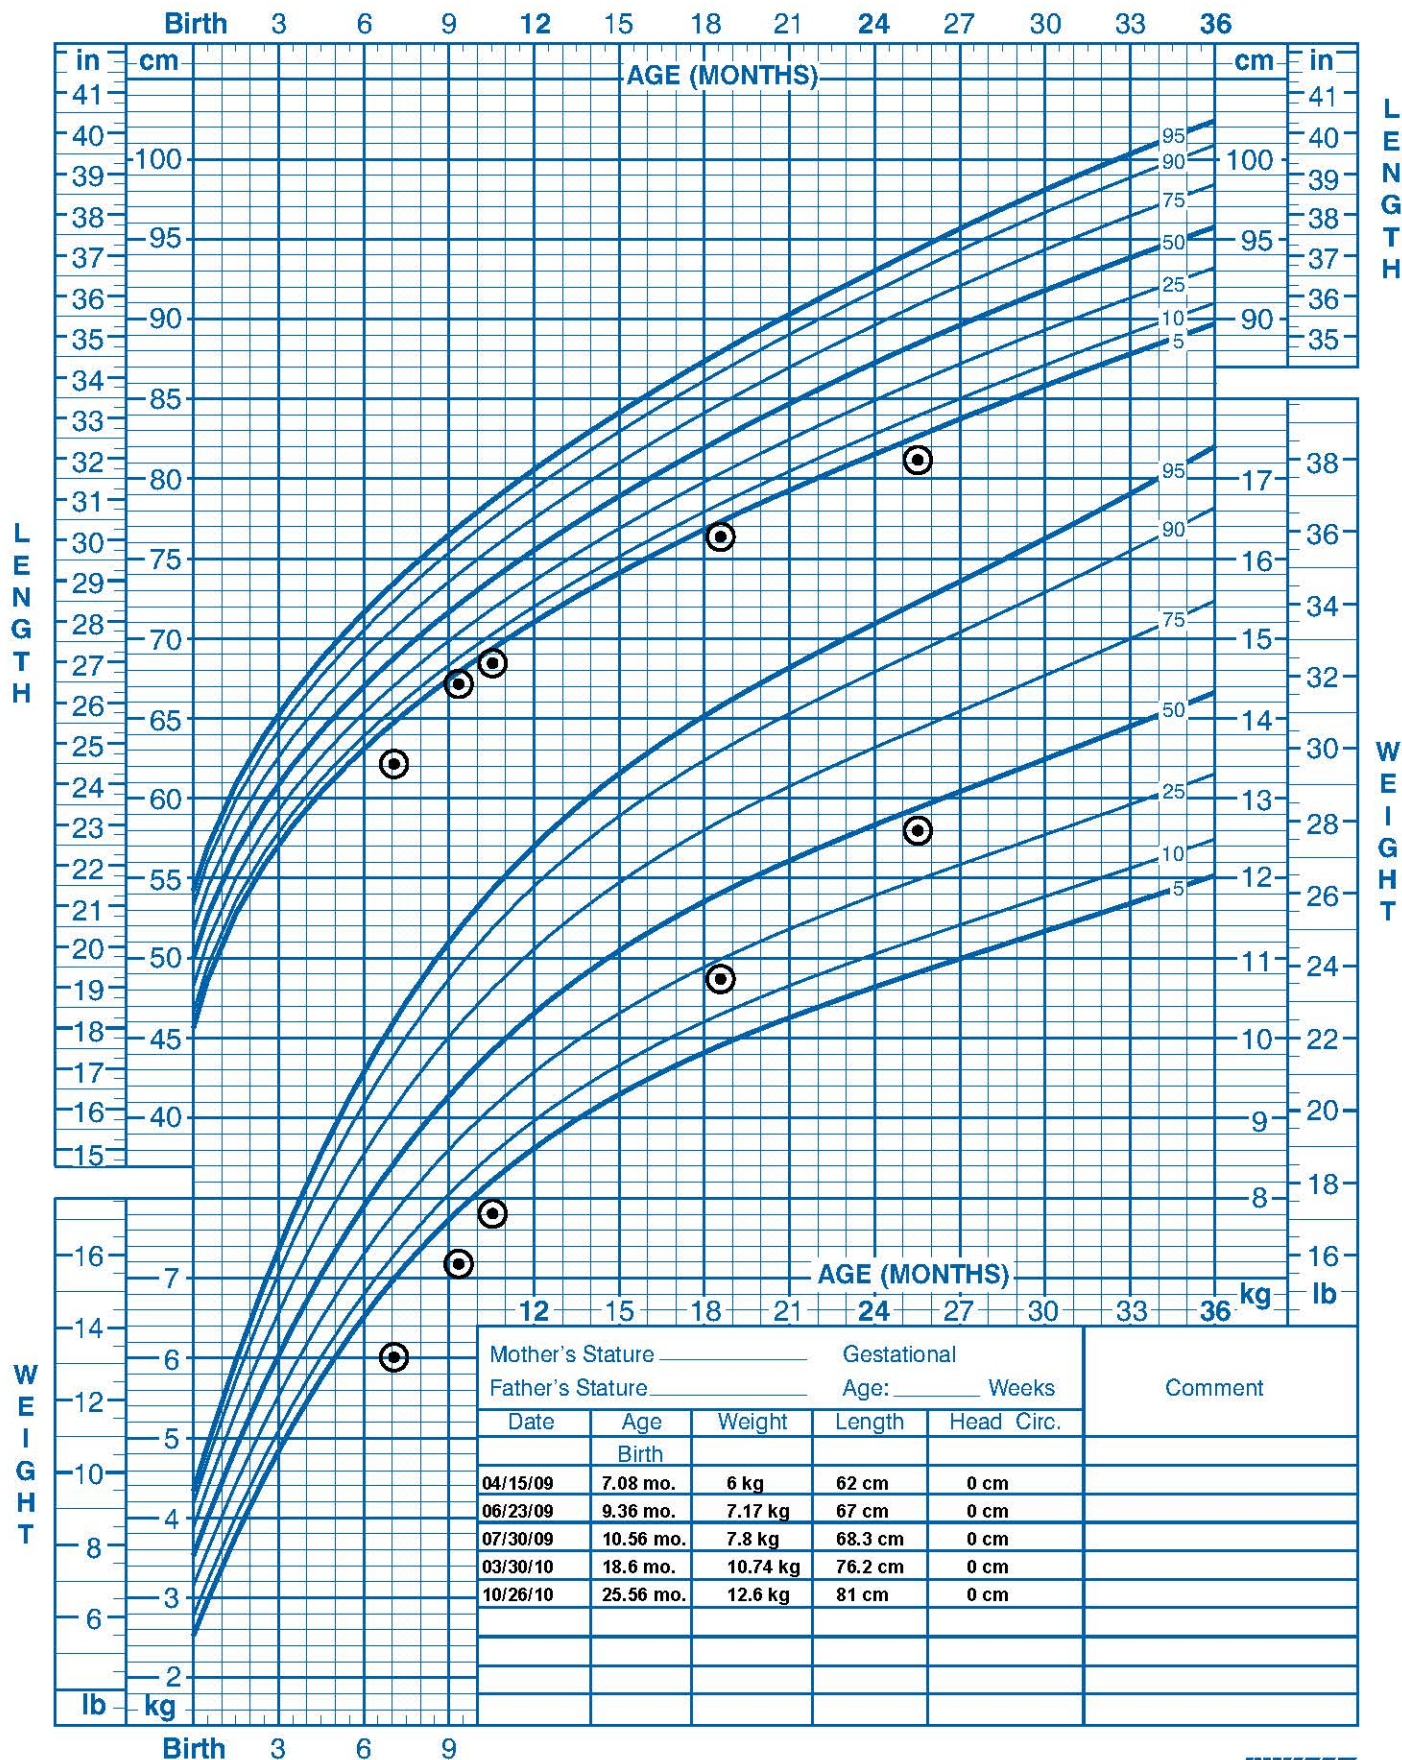

| Mother's Stature _____ |           | Gestational Age: _____ Weeks |         |            | Comment |
|------------------------|-----------|------------------------------|---------|------------|---------|
| Father's Stature _____ |           |                              |         |            |         |
| Date                   | Age       | Weight                       | Length  | Head Circ. |         |
| Birth                  |           |                              |         |            |         |
| 04/15/09               | 7.08 mo.  | 6 kg                         | 62 cm   | 0 cm       |         |
| 06/23/09               | 9.36 mo.  | 7.17 kg                      | 67 cm   | 0 cm       |         |
| 07/30/09               | 10.56 mo. | 7.8 kg                       | 68.3 cm | 0 cm       |         |
| 03/30/10               | 18.6 mo.  | 10.74 kg                     | 76.2 cm | 0 cm       |         |
| 10/26/10               | 25.56 mo. | 12.6 kg                      | 81 cm   | 0 cm       |         |

Published May 30, 2000 (modified 4/20/01).

SOURCE: Developed by the National Center for Health Statistics in collaboration with the National Center for Chronic Disease Prevention and Health Promotion (2000). <http://www.cdc.gov/growthcharts>

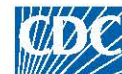

SAFER • HEALTHIER • PEOPLE™

# 2 to 20 years: Boys Stature-for-age and Weight-for-age percentiles

NAME **Patient 9**

RECORD # \_\_\_\_\_

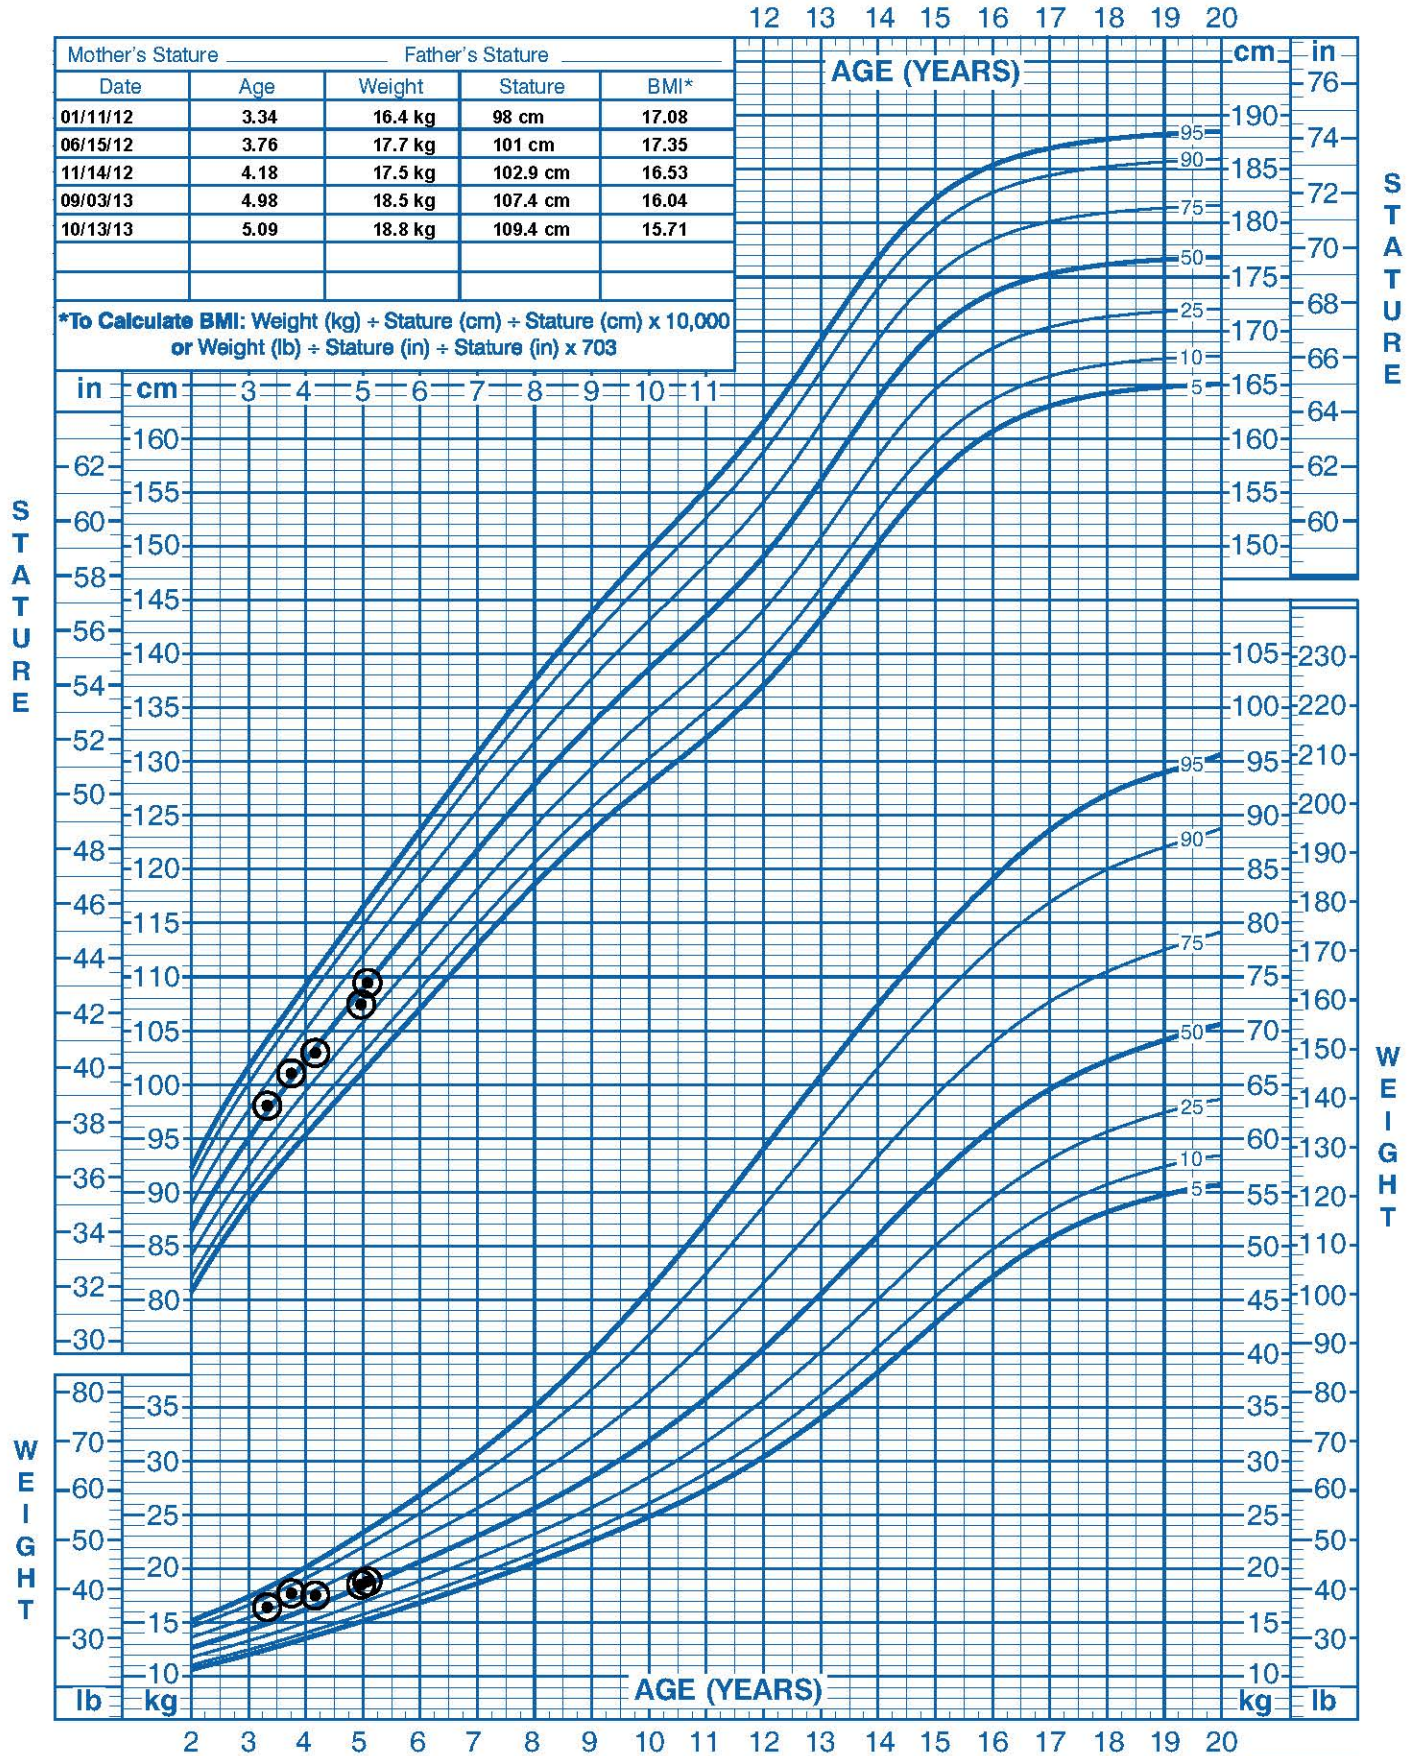

Published May 30, 2000 (modified 11/21/00).

SOURCE: Developed by the National Center for Health Statistics in collaboration with the National Center for Chronic Disease Prevention and Health Promotion (2000).  
<http://www.cdc.gov/growthcharts>

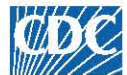

SAFER • HEALTHIER • PEOPLE™
